# Supplementary material for: Regional disparities in access to coordinated health care in Poland: development and application of an accessibility index
Source: Research Square preprint supplement (doi:10.21203/rs.3.rs-7663418/v1), 2025-10-16
Supplement: Supplementary file 1 [file c6226c43bd81cedc2852b8a4.docx]

Appendix

Table A1 Pearson correlations between selected variables for 16 voivodeships

| Specification | | Mean | | --- | | | Std. deviation | | --- | | | Disposable income per capita (in PLN) | | --- | | | Health expenditure per capita (in PLN) | | --- | | | Share of health expenditure in disposable income (HEBI) | | --- | | | Index of Subjective Assessment of Health Needs Satisfaction (SIHNS) | | --- | | Share of households assessing the satisfaction of healthcare needs as good or rather good (in percent) |
| --- | --- | --- | --- | --- | --- | --- | --- | --- | --- | --- | --- | --- | --- |
| Disposable income per capita (in PLN) | 2896,2 | 286,46 | 1,000 | 0,278 | -0,460 | 0,082 | 0,083 |
| Health expenditure per capita (in PLN) | 112,4 | 14,77 | 0,278 | 1,000 | 0,717 | -0,125 | -0,030 |
| Share of health expenditure in disposable income (HEBI) | 3,9 | 0,58 | -0,460 | 0,717 | 1,000 | -0,126 | -0,044 |
| Index of Subjective Assessment of Health Needs Satisfaction (SIHNS) | 0,8 | 0,03 | 0,082 | -0,125 | -0,126 | 1,000 | 0,959 |
| Share of households assessing the satisfaction of healthcare needs as good or rather good (in percent) | 70,5 | 6,27 | 0,083 | -0,030 | -0,044 | 0,959 | 1,000 |

Table A2. Structure of health care expenditure

| Voivodeship | Health per cap | Pharmaceutical products | Contraceptives and other pharmaceutical products | Eyeglasses, hearing aids and other equipment | Medical services | Dental services | Laboratory and rehabilitation services | Hospital and sanatorium services |
| --- | --- | --- | --- | --- | --- | --- | --- | --- |
|  | In PLN | In percent |  |  |  |  |  |  |
| Dolnoslaskie | 134 | 57,9 | 1,7 | 8,1 | 9,4 | 10,8 | 6,8 | 5,3 |
| Kujawsko-Pomorskie | 121 | 67,2 | 1,9 | 6,7 | 9,6 | 7,5 | 4,7 | 2,3 |
| Lubelskie | 117 | 65,9 | 1,8 | 5,2 | 9,8 | 9,3 | 3,1 | 4,9 |
| Lubuskie | 96 | 68,6 | 1,2 | 10,7 | 6,4 | 4,3 | 5,2 | 3,6 |
| Lodzkie | 135 | 61,8 | 1,3 | 5,7 | 10,5 | 9,6 | 8,2 | 2,9 |
| Małopolskie | 105 | 61,9 | 0,9 | 8,1 | 8,4 | 7,0 | 6,7 | 7,0 |
| Mazowieckie | 134 | 59,8 | 1,5 | 4,8 | 9,7 | 10,2 | 8,9 | 5,0 |
| Opolskie | 118 | 68,2 | 2,5 | 4,8 | 9,9 | 6,1 | 5,9 | 2,6 |
| Podkarpackie | 88 | 73,5 | 1,5 | 6,0 | 7,0 | 6,8 | 4,6 | 0,6 |
| Podlaskie | 92 | 74,1 | 1,3 | 6,8 | 5,5 | 7,2 | 2,7 | 2,5 |
| Pomorskie | 120 | 63,8 | 2,9 | 6,6 | 7,5 | 9,4 | 8,6 | 1,2 |
| Slaskie | 113 | 65,0 | 1,6 | 6,6 | 7,8 | 8,4 | 5,7 | 4,9 |
| Świętokrzyskie | 113 | 61,3 | 2,2 | 4,9 | 11,1 | 10,4 | 2,7 | 7,3 |
| Warminsko-Mazurskie | 97 | 70,1 | 1,2 | 8,7 | 6,5 | 8,1 | 2,2 | 3,4 |
| Wielkopolskie | 112 | 65,3 | 1,4 | 6,5 | 8,8 | 6,8 | 5,3 | 6,0 |
| Zachodniopomorskie | 104 | 72,2 | 1,9 | 3,9 | 5,1 | 8,3 | 3,3 | 5,4 |
| Total | 115 | 64,5 | 1,7 | 6,3 | 8,6 | 8,6 | 6,0 | 4,3 |
